# Supplementary material for: National health governance, science and the media: drivers of COVID-19 responses in Germany, Sweden and the UK in 2020
Source: PubMed Central journal article supplement (PMC8764706; doi:10.1136/bmjgh-2021-006691), 2021-11-17
Supplement: bmjgh-2021-006691supp001.pdf [file bmjgh-2021-006691supp001.pdf]

**Web annex 1: List of websites searched and search term:****Germany:**

Robert Koch Institute [https://www.rki.de/DE/Home/homepage\\_node.html](https://www.rki.de/DE/Home/homepage_node.html): Leitbild, Coronavirus, Gesundheitsmonitoring, Fallzahlen und Meldungen, Allgemeine Infektionsschutzmassnahmen, Forschung

Bundesregierung <https://www.bundesregierung.de/breg-de>: Coronavirus, Kabinett, Infektionsschutzgesetz

Bundesgesundheitsamt <https://www.bundesgesundheitsministerium.de/>: Coronavirus

ARD <https://www.daserste.de/sendungen-a-z/archive-az-100.html> and ZDF <https://www.zdf.de/sendungen-a-z>: Coronavirus

**Sweden:**

Public Health Agency: <https://www.folkhalsomyndigheten.se/>: om Folkhälsomyndigheten, uppdrag, Covid-19, Smittskydd & beredskap, statistik och analyser, Verksamheter, undersökningar och studier

Government: <https://www.regeringen.se/>: Coronapandemin, krisberedskap

**UK:**

Government <https://www.gov.uk/>: Coronavirus, legislation, Coronavirus Act 2020, SAGE, test, track and trace, deaths testing for coronavirus

Parliament <https://www.parliament.uk/>: coronavirus, House of Commons

Independent SAGE <https://www.independentsage.org/>
