# Supplementary material for: National health governance, science and the media: drivers of COVID-19 responses in Germany, Sweden and the UK in 2020
Source: PubMed Central journal article supplement (PMC8764706; doi:10.1136/bmjgh-2021-006691), 2021-11-17
Supplement: bmjgh-2021-006691supp002.pdf [file bmjgh-2021-006691supp002.pdf]

**Web Annex 2: Web annex table 1 References for timeline**

| Month         | Germany                                                                                                                                                                                                                                                                                                                                                                                                    | Sweden                                                                                                                                                                                                                                                                                                           | UK                                                                                                                                                                                                                                                                                                                                                |
|---------------|------------------------------------------------------------------------------------------------------------------------------------------------------------------------------------------------------------------------------------------------------------------------------------------------------------------------------------------------------------------------------------------------------------|------------------------------------------------------------------------------------------------------------------------------------------------------------------------------------------------------------------------------------------------------------------------------------------------------------------|---------------------------------------------------------------------------------------------------------------------------------------------------------------------------------------------------------------------------------------------------------------------------------------------------------------------------------------------------|
| January / Feb | 28 <sup>th</sup> Jan Activation of emergency measures                                                                                                                                                                                                                                                                                                                                                      | 31 <sup>st</sup> Jan first case <sup>1</sup><br>26 Feb High alert <sup>1</sup>                                                                                                                                                                                                                                   | 10 <sup>th</sup> February they launched the Health Protection (coronavirus) Regulations.                                                                                                                                                                                                                                                          |
|               | 1 <sup>st</sup> Feb Extension of the national surveillance system to include SARS-CoV-2 / COVID-19<br>28 Feb limited level of treat by RKI <sup>2</sup>                                                                                                                                                                                                                                                    |                                                                                                                                                                                                                                                                                                                  |                                                                                                                                                                                                                                                                                                                                                   |
| March         | The RKI raised the level of threat containment and follow up of cases to establish the infection threads Adapted Pandemieplan <sup>3</sup> .<br>We stay home” became a main slogan <sup>4</sup><br>9 <sup>th</sup> of March: ban of larger events<br>11 <sup>th</sup> March speech from Merkel <sup>5</sup><br>13 <sup>th</sup> March closure of schools, non-essential jobs, cultural events <sup>2</sup> | 11 Mar gatherings of > 500 people forbidden <sup>1</sup><br>16 Mar encouragement to work from home if possible <sup>1</sup><br>17 Mar distance learning grade 10-12 and universities <sup>1</sup><br>27 Mar gathering of > 50 people forbidden <sup>1</sup><br>30 Mar visits to elderly care banned <sup>1</sup> | 2 March SAGE proposes community transmission <sup>6</sup><br>16 March Imperial college modelling study published<br>16 March advise against non-essential travelling <sup>6</sup><br>18 / 20 March announcement to close schools, cafés, cultural activities etc <sup>6</sup><br>23 March shutdown except essential serices and work <sup>6</sup> |
| April         | Careful opening strategy <sup>7</sup><br>22 April Schools open in some Bundesländer<br>29 <sup>th</sup> April making becomes mandatory in public spaces <sup>8</sup>                                                                                                                                                                                                                                       | 14 April 22 scientist requests the government to take over the handling <sup>9</sup><br>15 April claim of that 1/3 <sup>rd</sup> of the Stockholm population to be infected by 1 <sup>st</sup> May, widely picked also by international media <sup>10,11</sup>                                                   | 6 April PM admitted to intensive care unit with COVID-19 infection <sup>12</sup>                                                                                                                                                                                                                                                                  |
| May           |                                                                                                                                                                                                                                                                                                                                                                                                            | 30 May, Johan Giesecke publishes “The invisible pandemic” <sup>13</sup>                                                                                                                                                                                                                                          | 10 May easing of restrictions <sup>6</sup>                                                                                                                                                                                                                                                                                                        |
| June / July   | 16 <sup>th</sup> June Corona waning app launched <sup>2</sup>                                                                                                                                                                                                                                                                                                                                              | Summer holidays started on the 9 <sup>th</sup> of June<br>8 Juli New modelling published <sup>14</sup>                                                                                                                                                                                                           | 15 June Face masks compulsory<br>23 face masks guidance published                                                                                                                                                                                                                                                                                 |
| August        | 1st August Corona protests in Berlin <sup>15</sup>                                                                                                                                                                                                                                                                                                                                                         | 17 Aug, schools re-open after the summer break, all classes<br>21 Aug Lövfén confirms that the strategy was right <sup>16</sup>                                                                                                                                                                                  | 8 August further face mask restrictions come into force <sup>12</sup>                                                                                                                                                                                                                                                                             |
| September     | 29 Sept traffic light system for regional responses agreed <sup>17</sup>                                                                                                                                                                                                                                                                                                                                   |                                                                                                                                                                                                                                                                                                                  | 9 <sup>th</sup> September rule of six published <sup>12</sup><br>21 <sup>st</sup> September pubs closed after 10 pm <sup>12</sup>                                                                                                                                                                                                                 |
| October       | 7 Oct Beherbergungsverbot <sup>18</sup>                                                                                                                                                                                                                                                                                                                                                                    |                                                                                                                                                                                                                                                                                                                  | 12 <sup>th</sup> October 3-trier system published <sup>12</sup>                                                                                                                                                                                                                                                                                   |

|          |                                                                                                                                                                                      |                                                                                                                 |                                                                                                                                                                                                 |
|----------|--------------------------------------------------------------------------------------------------------------------------------------------------------------------------------------|-----------------------------------------------------------------------------------------------------------------|-------------------------------------------------------------------------------------------------------------------------------------------------------------------------------------------------|
|          | 29 Oct partial lockdown <sup>19</sup>                                                                                                                                                |                                                                                                                 |                                                                                                                                                                                                 |
| November |                                                                                                                                                                                      | 16 Nov Löfvén promises to take responsibility <sup>20</sup><br>24 Nov rule of eight <sup>21</sup>               |                                                                                                                                                                                                 |
| December | 1st Dec further restrictions to meet people <sup>19</sup><br>16 <sup>th</sup> December comprehensive restrictions including closing of schools and non-essential shops <sup>22</sup> | 15 Dec Corona Commission <sup>23</sup><br>Swedish King, Carl Gustaf says "I think we have failed" <sup>24</sup> | 8 <sup>th</sup> Dec Immunization campaign started <sup>12</sup><br>19 <sup>th</sup> Dec mutants detected <sup>12</sup><br>19 <sup>th</sup> 4 trier published (stay at home order) <sup>12</sup> |

## References

- Ludvigsson JF. The first eight months of Sweden's COVID-19 strategy and the key actions and actors that were involved. *Acta paediatrica (Oslo, Norway : 1992)* 2020; **109**(12): 2459-71.
- VDAB. Ereignis-Zeitstrahl. 2020. <https://www.corona.vdab.de/zeitstrahl/?L=0> (accessed 28 March 2021).
- Robert Koch Institute. Vorverteilungen und Massnahmen in Deutschland, Version 1.0 (Stand 04.03.2020), Ergänzung zum Nationalen Pandemieplan – COVID-19 – neuartige Coronaviruserkrankung. 2020. [https://www.rki.de/DE/Content/InfAZ/N/Neuartiges\\_Coronavirus/Ergaenzung\\_Pandemieplan\\_Covid.pdf?blob=publicationFile](https://www.rki.de/DE/Content/InfAZ/N/Neuartiges_Coronavirus/Ergaenzung_Pandemieplan_Covid.pdf?blob=publicationFile) (accessed 12 April 2020).
- Bundesministerium fuer Gesundheit. Zusammen gegen Corona: #WirBleibenZuhause. 2020. [https://twitter.com/bmg\\_bund/status/1240315836369440768?lang=en](https://twitter.com/bmg_bund/status/1240315836369440768?lang=en) (accessed 8 Jan 2021).
- Merkel: Coronavirus is Germany's greatest challenge since World War II. 2020 Deutsche Welle 2020.
- Sanders KB. British government communication during the 2020 COVID-19 pandemic: learning from high reliability organizations. *Church, Communication and Culture* 2020; **5**(3): 356-77.
- Safi M, Willsher K, Holmer O. Germany and Norway ease lockdown but Spain and France hold off. *The Guardian*, <https://www.theguardian.com/world/2020/apr/19/israel-and-south-korea-to-ease-coronavirus-lockdowns> 2020.
- Deutschland.de. Coronavirus in Germany 2020. <https://www.deutschland.de/de/die-timeline-coronavirus-germany-deutschland> (accessed 28 March 2021).
- 22 Forskare. Folkhälsomyndigheten har misslyckats - nu måste politikerna gripa in. Dagens Nyheter. 14 April 2020.
- Public Health Agency. Skattning av peakdag och antal infekterade i covid-19-utbrottet i Stockholms län februari-april 2020 2020. <https://www.folkhalsomyndigheten.se/publicerat-material/publikationsarkiv/s/skattning-av-peakdag-och-antal-infekterade-i-covid-19-utbrottet-i-stockholms-lan-februari-april-2020/> (accessed 15 Feb 2021).
- Nikel D. Sweden: 600,000 Coronavirus Infections In Stockholm By May 1, Model Estimates 2020, Forbes Apr 21,. <https://www.forbes.com/sites/davidnikel/2020/04/21/sweden-600000-coronavirus-infections-in-stockholm-by-may-1-model-estimates/> (accessed 2 Jan 2021).
- British Foreign Policy Group. COVID-19 timeline. 2020. <https://bfp.org.uk/2020/04/covid-19-timeline/> (accessed 28 March 2021).
- Giesecke J. The invisible pandemic. *Lancet (London, England)* 2020; **395**(10238): e98.
- Public Health Agency. Scenarier – Tre smittspridningsscenarier inom regeringsuppdraget "Plan inför eventuella nya utbrott av covid-19" 2020. <https://www.folkhalsomyndigheten.se/publicerat-material/publikationsarkiv/s/scenarier--tre-smittspridningsscenarier-inom-regeringsuppdraget-plan-infor-eventuella-nya-utbrott-av-covid-19/> (accessed 15 Feb 2021).

15. Coronavirus: Thousands protest in Germany against restrictions. <https://www.bbc.com/news/world-europe-53622797> (accessed 28 March 2021).
16. Löfven S. Löfven om Sveriges strategi: Vi valde rätt. Expressen, . 2020.
17. Bundesgesundheitsministerium. Chronik-Coronavirus. 2020. <https://www.bundesgesundheitsministerium.de/coronavirus/chronik-coronavirus.html> (accessed 28 March 2021).
18. zdfheute. Beherbergungsverbot: Fast alle Länder einig 7 Oct 2020. <https://www.zdf.de/nachrichten/politik/coronavirus-beherbergungsverbot-reisende-risikogebiete-100.html> (accessed 28 March 2021).
19. Zdfheute. Lockdown. Die neuen Corona-Regels von Bund und Ländern 29 October 2020. <https://www.zdf.de/nachrichten/politik/coronavirus-lockdown-massnahmen-november-100.html> (accessed 28 March 2021).
20. Löfven S. Presskonferens 16 Nov 2020. 2020. <https://www.svt.se/nyheter/inrikes/stefan-lofven-kallar-till-presskonferens> (accessed 15 Feb 2021).
21. Regeringen. Förbud mot att hålla allmänna sammankomster och offentliga tillställningar med fler än åtta deltagare. 16 Nov 2020. <https://www.regeringen.se/rattsliga-dokument/departementsserien-och-promemorior/2020/11/forbud-mot-att-halla-allmanna-sammankomster-och-offentliga-tillstallningar-med-fler-an-atta-deltagare/> (accessed 15 Feb 2021).
22. Zdfheute. Die Dezember-Beschluesse im Ueberblick 13 December 2020. <https://www.zdf.de/nachrichten/politik/corona-shutdown-einzelhandel-schulen-kitas-100.html> (accessed 28 March 2021).
23. Melin M, Ahlbäck Öberg S, A E, et al. The Corona Commission. Elderly care during the pandemic. Ministry of Health and Social Affairs, summary of SOU 2020:80. 2020. [https://www.government.se/4af26a/contentassets/2b394e1186714875bf29991b4552b374/summary-of-sou-2020\\_80-elderly-care-during-the-pandemic.pdf](https://www.government.se/4af26a/contentassets/2b394e1186714875bf29991b4552b374/summary-of-sou-2020_80-elderly-care-during-the-pandemic.pdf) (accessed 2 Jan 2021).
24. Lundahl P. King speaks out on pandemic: "We have failed". 17 Dec 2020. <https://sverigesradio.se/artikel/7626948> (accessed 15 Feb 2021).
