# Supplementary material for: National health governance, science and the media: drivers of COVID-19 responses in Germany, Sweden and the UK in 2020
Source: PubMed Central journal article supplement (PMC8764706; doi:10.1136/bmjgh-2021-006691), 2021-11-17
Supplement: bmjgh-2021-006691supp003.pdf [file bmjgh-2021-006691supp003.pdf]

Web annex 4 Web annex table 2: Media debates with Covid-19 as the main topic

| Weeks analysed    | <b>Germany</b> main public channels:<br>ARD and ZDF, selected search for<br>the second week per month | <b>Sweden</b><br>Two public channels SVT 1 & 2                                                                                                         |
|-------------------|-------------------------------------------------------------------------------------------------------|--------------------------------------------------------------------------------------------------------------------------------------------------------|
| 9-15 March 2020   | A. Wills (ARD)<br>M. Illner (ZDF)<br>M. Lanz, 2 sessions (ZDF)                                        | SVT has the debate format Mötet where in 2020 COVID-19 was 7x featured:<br><br>Framtiden, Forskana, Kulturen, Kostnaden, Karantän, Valfärden, Debatten |
| 6-12 April 2020   | M. Illner (ZDF)<br>M. Lanz, 2 sessions (ZDF)                                                          |                                                                                                                                                        |
| 11-16 May 2020    | A Wills (ARD)<br>M. Illner (ZDF)<br>M Lanz 2 sessions(ZDF)                                            |                                                                                                                                                        |
| 8-14 June 2020    | M. Illner (ZDF)<br>M Lanz (ZDF)                                                                       |                                                                                                                                                        |
| 6-12 July 2020    | Sommerbreak                                                                                           |                                                                                                                                                        |
| 10-16 August 2020 | Sommerbreak                                                                                           |                                                                                                                                                        |
| 7-13 Sept 2020    | S. Maischberger (ARD)<br>M. Illner (ZDF)<br>M Lanz, 3 sessions (ZDF)                                  |                                                                                                                                                        |
| 12-18 Oct         | S. Maischberger (ARD)<br>M. Illner (ZDF)<br>M. Lanz, 3 sessions (ZDF)                                 |                                                                                                                                                        |
| 9-15 Nov          | A Wills (ARD)<br>S. Maischberger (ARD)<br>M. Illner (ZDF)<br>M Lanz, 3 sessions (ZDF)                 |                                                                                                                                                        |
| 7-13 Dec 2020     | S. Maischberger (ARD)<br>M. Illner (ZDF)<br>M Lanz, 3 sessions (ZDF)                                  |                                                                                                                                                        |

<https://www.zdf.de/suche?q=illner&synth=true&sender=Gesamtes+Angebot&from=2020-06-08T00%3A00%3A00.000Z&to=2020-06-14T00%3A00%3A00.000Z&attrs=&abName=ab-2021-08-16&abGroup=gruppe-b>

[https://daserste.ndr.de/annewill/archiv/erste318\\_glossaryPage-7.html](https://daserste.ndr.de/annewill/archiv/erste318_glossaryPage-7.html)

<https://www.svtplay.se/sok?q=CORONA>
