# Supplementary material for: National health governance, science and the media: drivers of COVID-19 responses in Germany, Sweden and the UK in 2020
Source: PubMed Central journal article supplement (PMC8764706; doi:10.1136/bmjgh-2021-006691), 2021-11-17
Supplement: bmjgh-2021-006691supp004.pdf [file bmjgh-2021-006691supp004.pdf]

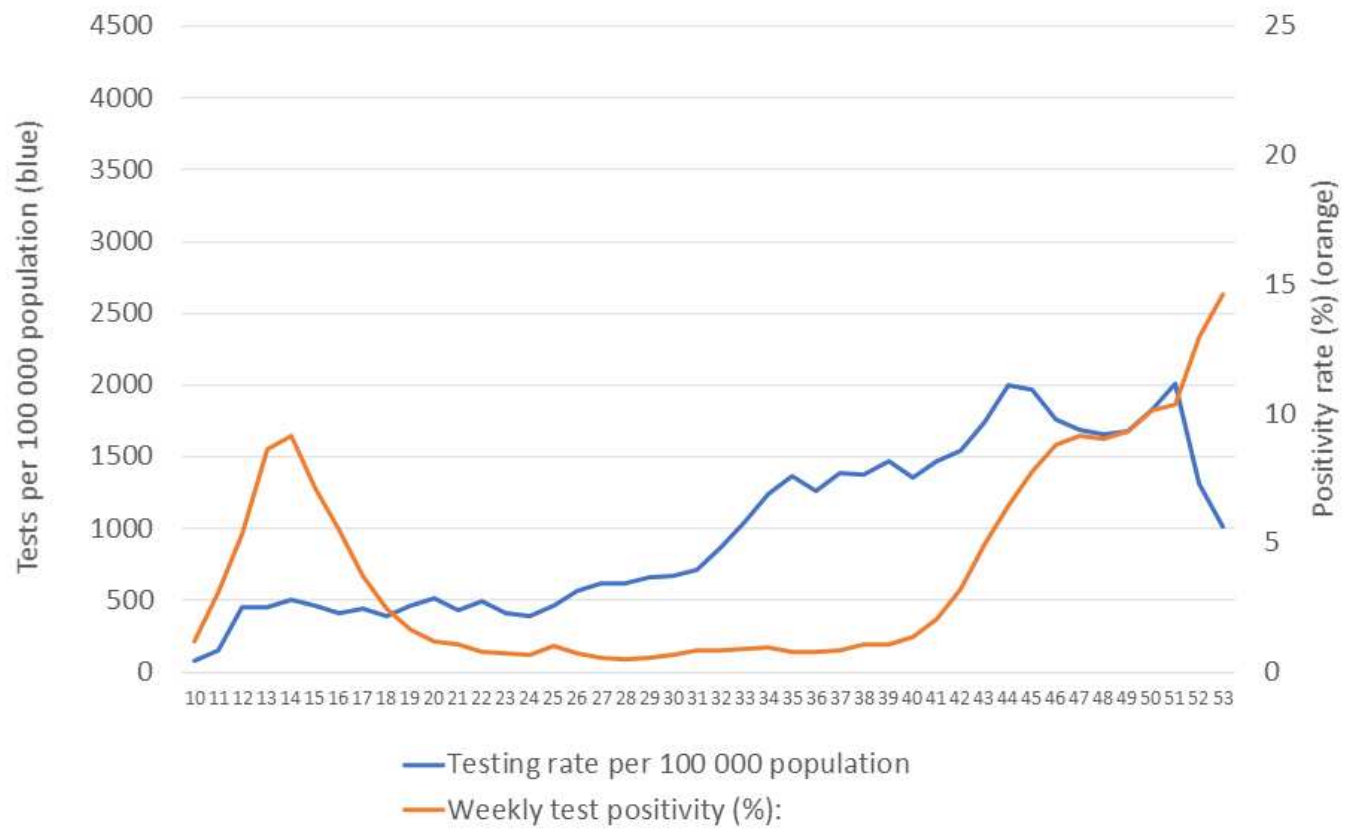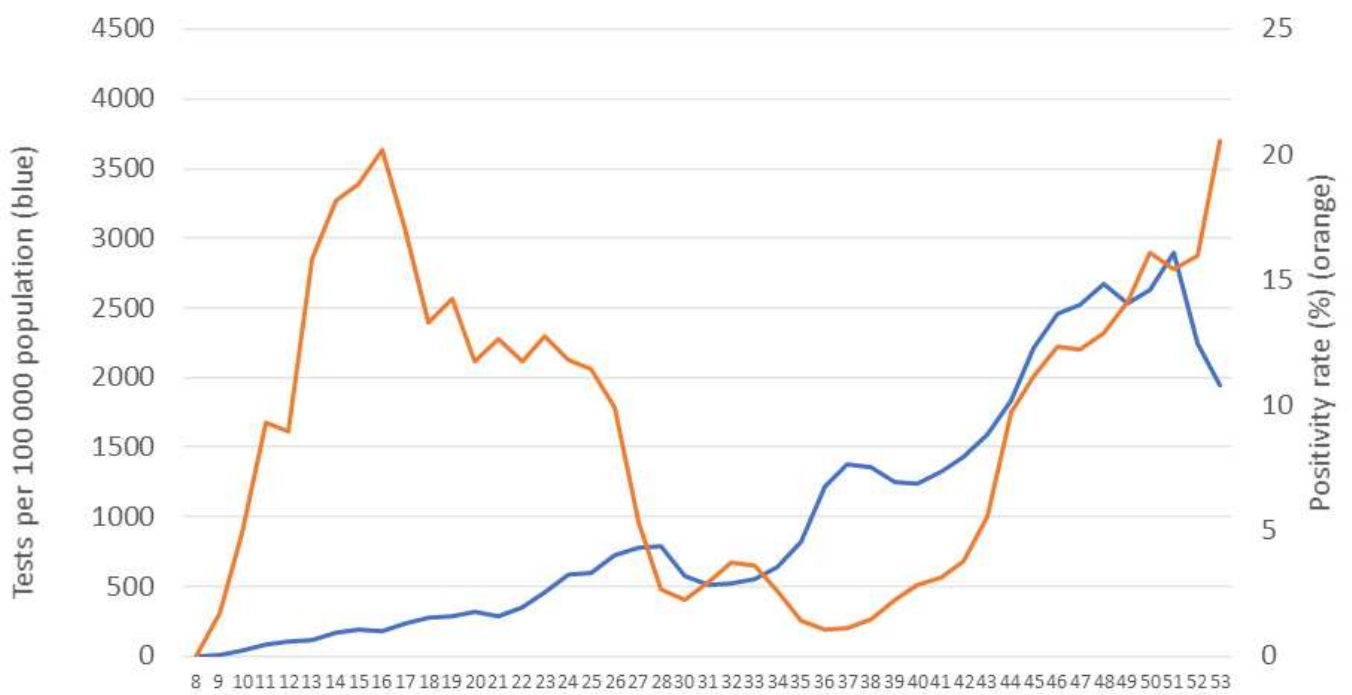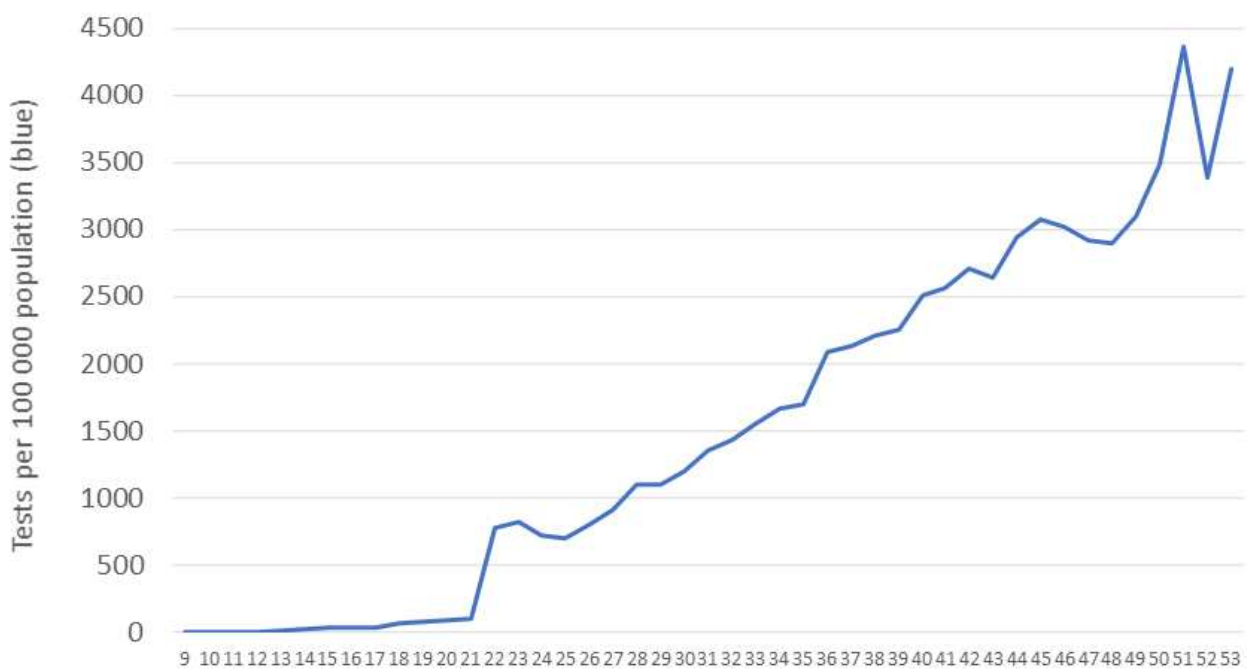

Annex Fig 1: Testing rate (blue) and positivity (yellow)
