# Supplementary material for: National health governance, science and the media: drivers of COVID-19 responses in Germany, Sweden and the UK in 2020
Source: HighWire-hosted journal article supplement (doi:10.1136/bmjgh-2021-006691), 2021-11-01
Supplement: bmjgh-2021-006691supp005_data_supplement.pdf [file bmjgh-2021-006691supp005_data_supplement.pdf]

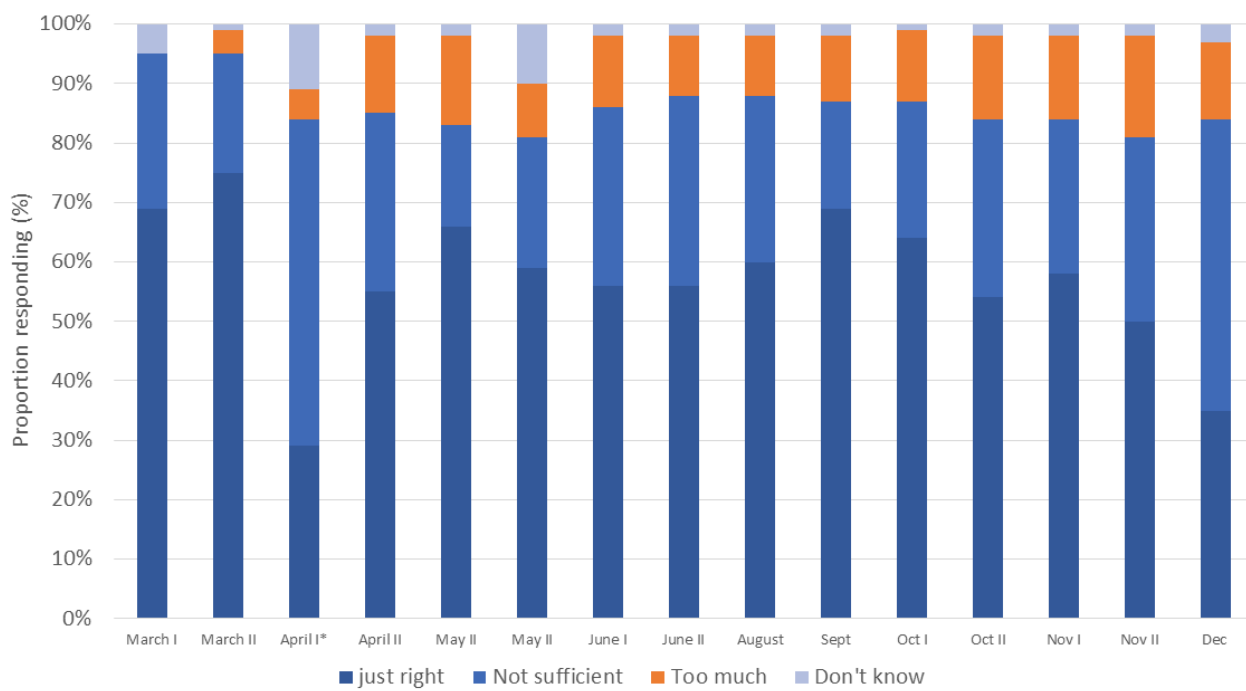

Web annex Figure 2: German polls of how the population views the Corona measures  
[https://www.forschungsgruppe.de/Umfragen/Politbarometer/Archiv/Politbarometer\\_2020/](https://www.forschungsgruppe.de/Umfragen/Politbarometer/Archiv/Politbarometer_2020/)
