# Supplementary figures and images for: National health governance, science and the media: drivers of COVID-19 responses in Germany, Sweden and the UK in 2020
Source: HighWire-hosted journal article supplement (doi:10.1136/bmjgh-2021-006691), 2021-11-01

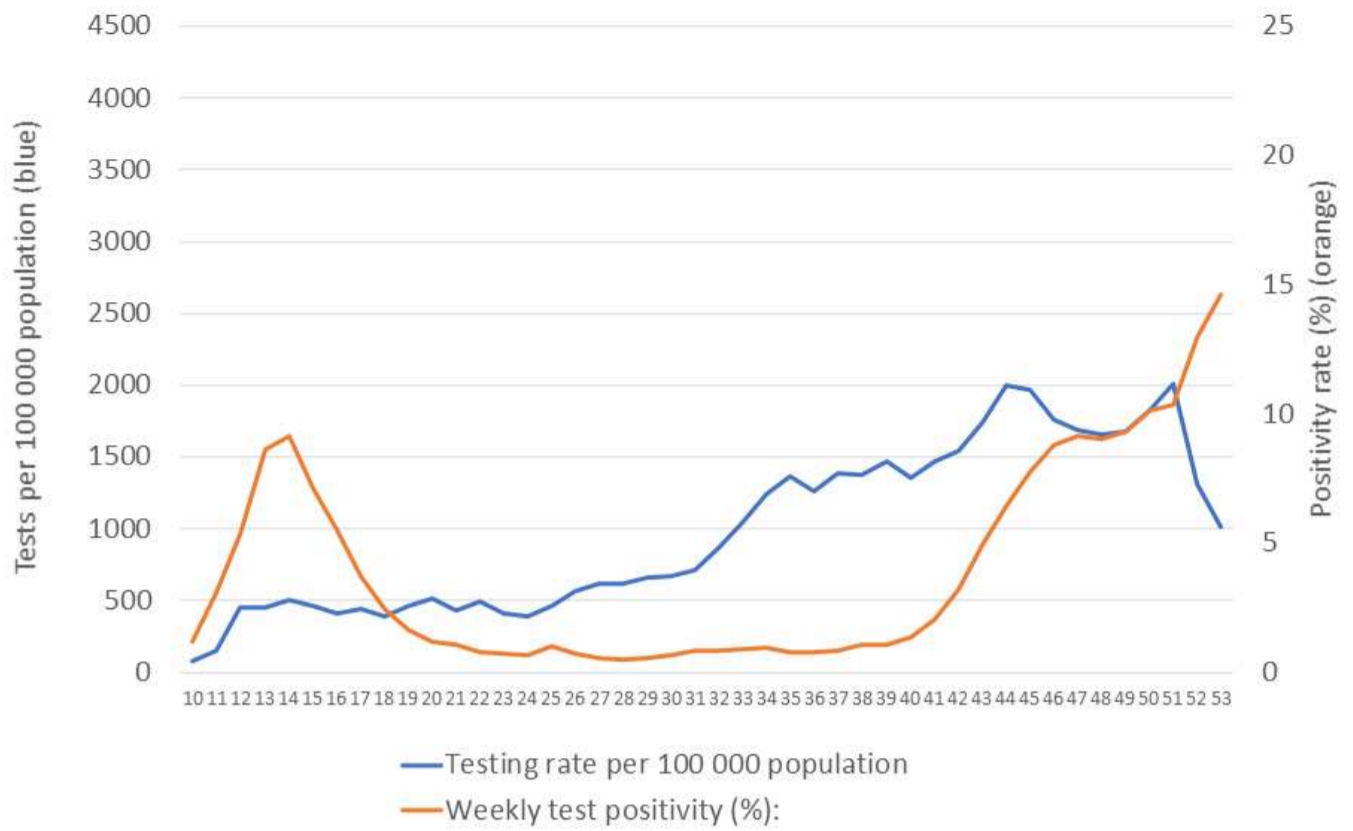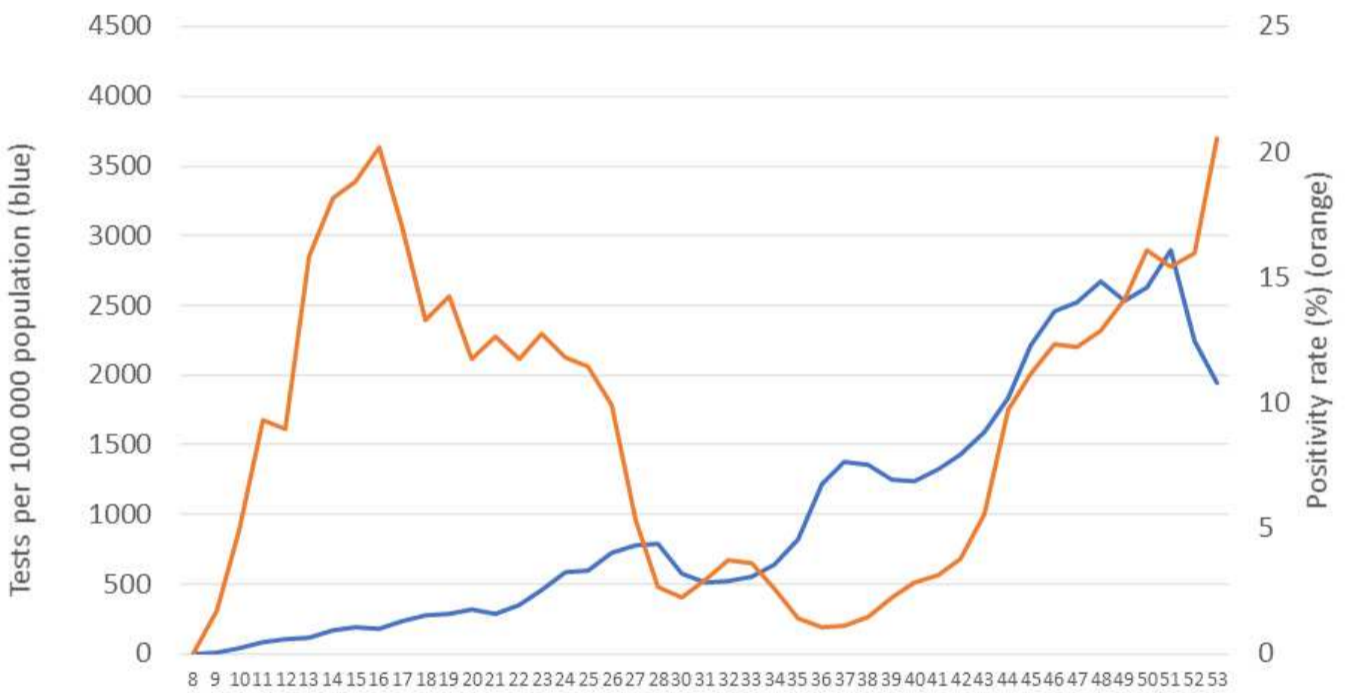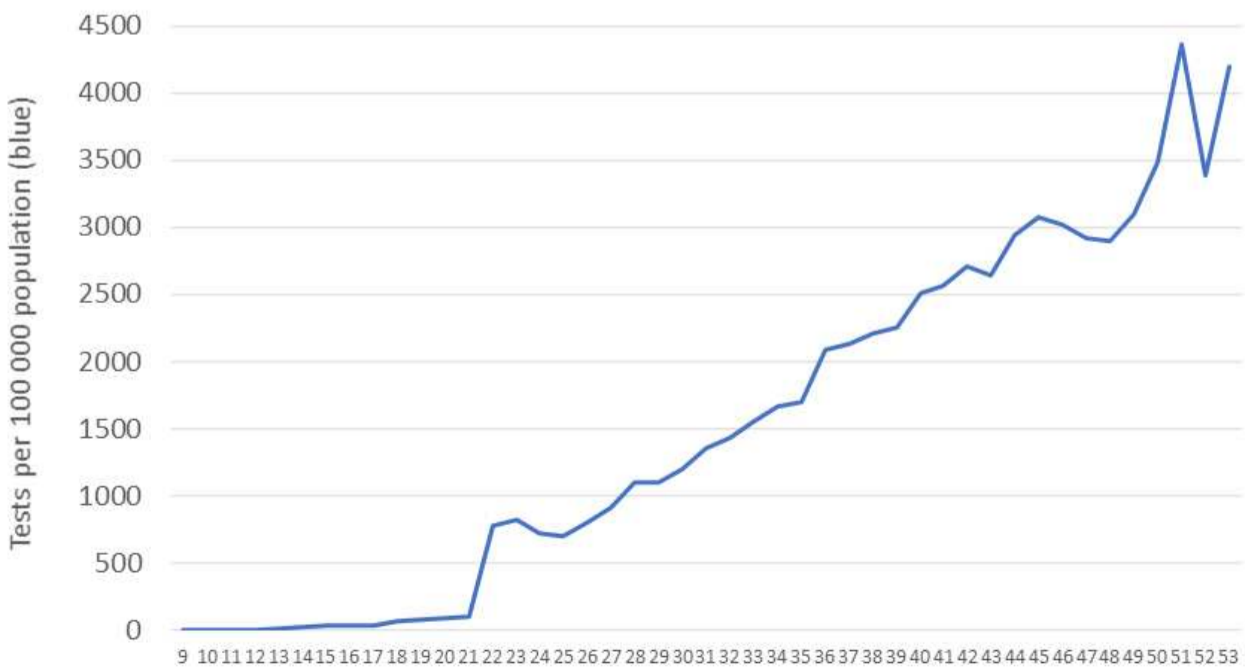

Annex Fig 1: Testing rate (blue) and positivity (yellow)

Supplement: bmjgh-2021-006691supp004_data_supplement.pdf [file bmjgh-2021-006691supp004_data_supplement.pdf]
